# Supplementary material for: Comparison of Genetic Profiling between Primary Tumor and Circulating Tumor Cells Captured by Microfluidics in Epithelial Ovarian Cancer: Tumor Heterogeneity or Allele Dropout?
Source: MDPI journal article supplement (doi:10.3390/diagnostics11061102), 2021-06-16
Supplement: s1 [file s1]

Comparisons of the genetic variations detected in primary tumor, CTCs, and PBMCs of the 2 patients with EOC

Table A1. Germline variations and somatic mutations detected in Patient 1 only (green), Patient 2 only (red), and both patients (yellow).

|                            | PBMCs    | Tumor     | CTCs    |
|----------------------------|----------|-----------|---------|
| <b>Germline variations</b> |          |           |         |
| <i>MERTK:c.1441C&gt;T</i>  | 0.48     | 1         | 0.53    |
| <i>SDHA:c.1886A&gt;T</i>   | 0.52     | 0.52      | 0.52    |
| <i>SDHA:c.1969G&gt;A</i>   | 0.4      | 0.5       | 0.4     |
| <i>VEGFA:c.1039G&gt;A</i>  | 0.51     | 0.32      | 0       |
| <i>ROS1:c.4813G&gt;C</i>   | 0.54     | 0.47      | NA      |
| <i>EPHB4:c.1112C&gt;T</i>  | 0.52     | 0.43      | NA      |
| <i>JAK2:c.2958C&gt;G</i>   | 0.6      | 0.58      | NA      |
| <i>BRCA2:c.7522G&gt;A</i>  | 0.51     | 0.32      | 0       |
| <i>BRIP1:c.430G&gt;A</i>   | 0.42     | 0         | 0.42    |
| <i>JAK3:c.1170G&gt;C</i>   | 0.58     | 0.49      | NA      |
| <i>CD22:c.964G&gt;A</i>    | 0.46     | 0.42      | 0       |
| <i>AR:c.1889C&gt;T</i>     | 1        | 1         | 1       |
| <i>ATRX:c.2785G&gt;C</i>   | 1        | 1         | 1       |
| <i>ATRX:c.2540T&gt;C</i>   | 0.52     | 0.5       | NA      |
| <i>BRCA1:c.3929C&gt;T</i>  | 0.51     | 0.5       | NA      |
| <i>CEBPA:c.365G&gt;A</i>   | 0.59     | 0.5       | NA      |
| <i>CYP17A1:c.32C&gt;T</i>  | 0.48     | 0.5       | NA      |
| <i>DNMT3A:c.1903C&gt;G</i> | 0.18     | 0         | 0       |
| <i>EP300:c.6481A&gt;G</i>  | 0.46     | 0.5       | 0.64    |
| <i>EPHA3:c.2741G&gt;A</i>  | 0.51     | 0.5       | 0.75    |
| <i>INPP4B:c.1660G&gt;A</i> | 0.46     | 0.79      | 0.81    |
| <i>MET:c.1124A&gt;G</i>    | 0.47     | 0.38      | 0       |
| <i>RAD52:c.1037C&gt;A</i>  | 0.42     | 0.43      | 0.66    |
| <i>RICTOR:c.2348A&gt;G</i> | 0.47     | 0.58      | NA      |
| <i>SDHA:c.1944_1945del</i> | 0.11     | 0.25      | 0.65    |
| <i>SPEN:c.9730A&gt;C</i>   | 0.4/0.38 | 0.35/0.32 | NA/0.29 |
| <i>TP53:c.850A&gt;C</i>    | 0.19     | 0.66      | 0       |
| <i>TSC1:c.2285A&gt;G</i>   | 0.5      | 0.41      | 0.35    |

# Somatic mutations

|                             |      |      |         |
|-----------------------------|------|------|---------|
| <i>NOTCH2:c.320A&gt;C</i>   | 0.15 | 0.13 | 0       |
| <i>SNCAIP:c.453T&gt;G</i>   | 0.04 | 0.12 | 0.12    |
| <i>TNFAIP3:c.1606T&gt;C</i> | 0    | 0.26 | 0/NA    |
| <i>TP53:c.673-1G&gt;T</i>   | 0    | 0.3  | 0       |
| <i>GID4:c.127T&gt;A</i>     | 0    | 0.16 | 0.06    |
| <i>GID4:c.131G&gt;C</i>     | 0    | 0.15 | 0.086   |
| <i>SMARCA4:c.2389A&gt;C</i> | 0    | 0.15 | 0       |
| <i>SPEN:c.814C&gt;T</i>     | 0    | 0.14 | NA      |
| <i>PRKCI:c.850A&gt;T</i>    | 0    | 0.13 | 0       |
| <i>TP53:c.827C&gt;G</i>     | 0.17 | 0.66 | 0       |
| <i>TP53:c.1579G&gt;A</i>    | 0    | 0.64 | 0       |
| <i>SRC:c.7615A&gt;C</i>     | 0    | 0.45 | NA      |
| <i>SPEN:c.5518G&gt;T</i>    | 0    | 0    | 0.63    |
| <i>PIK3R1:c.562C&gt;A</i>   | 0    | 0    | 0.57    |
| <i>SPEN:c.2224T&gt;C</i>    | 0    | 0    | 0.48    |
| <i>SUFU:c.1057A&gt;G</i>    | 0    | 0    | 0.42    |
| <i>AR:c.2341A&gt;G</i>      | 0    | 0    | 0.48    |
| <i>ASXL1:c.3541A&gt;G</i>   | 0    | 0    | 0.44    |
| <i>IGF1R:c.2359A&gt;G</i>   | 0    | 0    | 0.43    |
| <i>MAP3K13:c.1973T&gt;C</i> | 0    | 0    | 0.53    |
| <i>PDGFRB:c.2107C&gt;T</i>  | 0    | 0    | 0.47    |
| <i>PTPN11:c.1255C&gt;T</i>  | 0    | 0    | 0.47    |
| <i>PIK3R1:c.562C&gt;T</i>   | 0    | 0    | 0.57    |
| <i>RICTOR:c.3770C&gt;G</i>  | 0    | 0    | 0.75    |
| <i>RICTOR:c.3577A&gt;G</i>  | 0    | 0    | 0.67    |
| <i>RICTOR:c.1781A&gt;G</i>  | 0    | 0    | 0.41    |
| <i>SPEN:c.8768T&gt;C</i>    | 0    | 0    | 0.71    |
| <i>SPEN:c.9160G&gt;C</i>    | 0    | 0    | NA/0.62 |

Numbers indicated variation allele frequencies. 0: wide type; NA: no sequencing coverage on the given locus.
